# Supplementary material for: Unevolved proteins from modern and prebiotic amino acids manifest distinct structural profiles
Source: bioRxiv or medRxiv preprint supplement (doi:10.1101/2021.08.29.458031), 2021-12-06
Supplement: Supplementary file [file media-1.pdf]

## Structured proteins are abundant in unevolved sequence space

Vyacheslav Tretyachenko<sup>1,2</sup>, Jiří Vymětal<sup>3</sup>, Tereza Neuwirthová<sup>1#</sup>, Jiří Vondrášek<sup>3</sup>, Kosuke Fujishima<sup>4,5</sup> and Klára Hlouchová<sup>\*1,3</sup>

### Supplementary Information

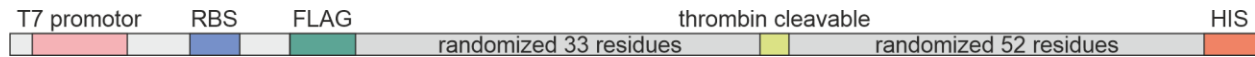

*Supplementary Figure S1. The general scheme of the library expression cassette. Construct is provided with necessary sequences for in vitro transcription and translation, FLAG/HIS affinity purification tags on N/C ends of proteins and the thrombin cleavage site in the middle of the protein coding sequence*

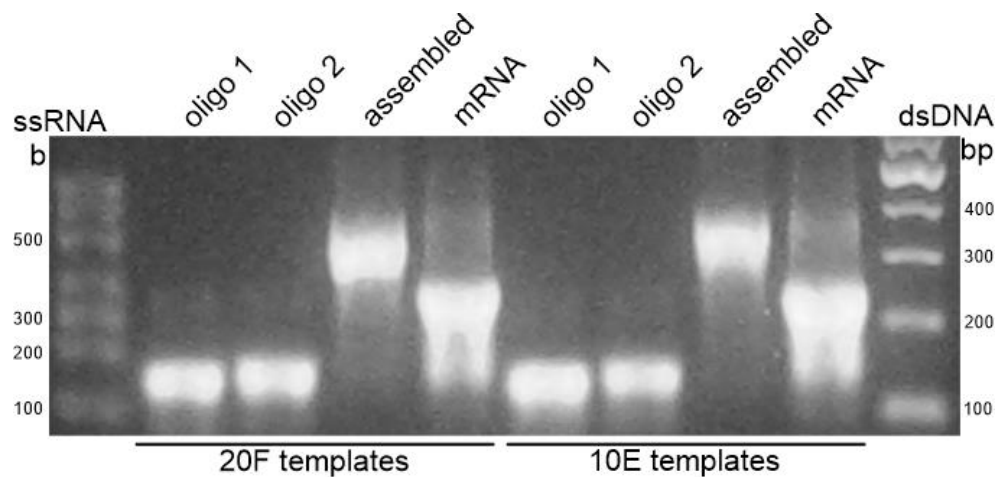

*Supplementary Figure S2. Agarose gel representing degenerate ssDNA and assembled dsDNA library templates (A) and transcribed mRNA templates (B)*

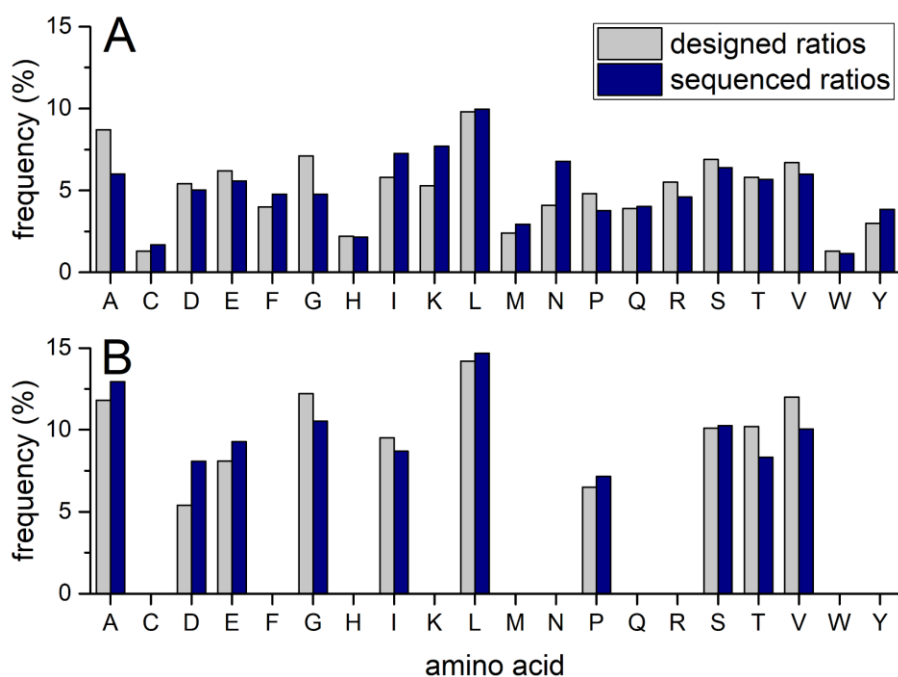

Supplementary Figure S3. Comparison of designed (grey) and experimental (blue) amino acid ratios in full (A) and early (B) alphabet libraries. Experimental amino acid distributions were calculated from the sequenced libraries DNA templates

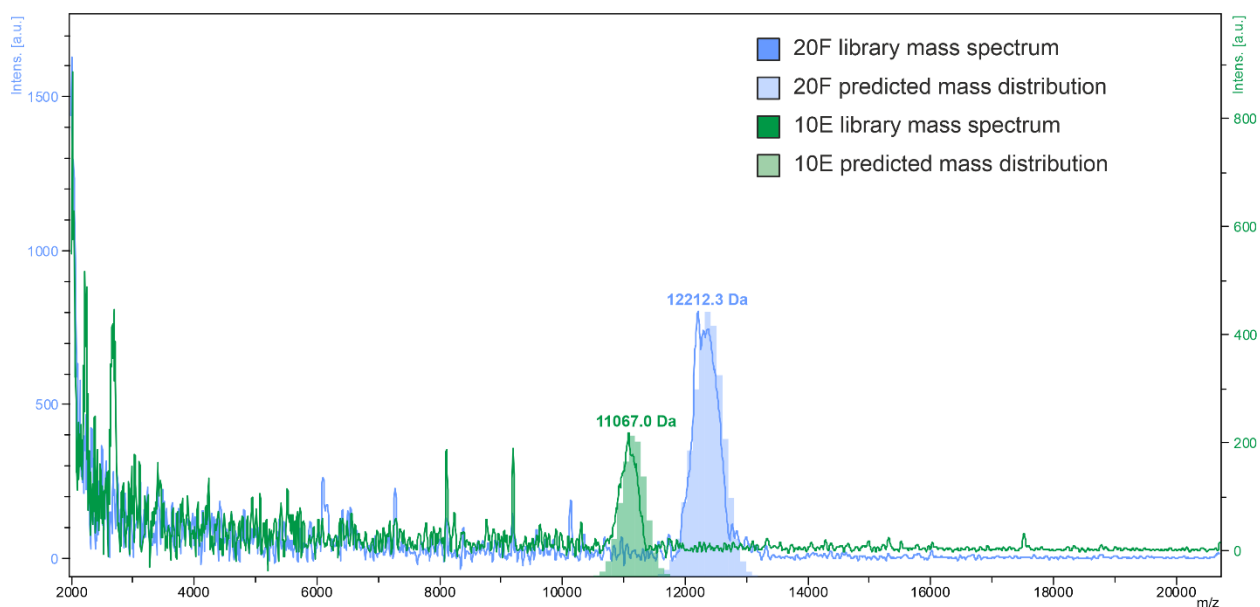

Supplementary Figure S4. Mass spectrometric analysis of purified full (blue) and early (green) alphabet libraries with their corresponding molecular weight distributions calculated in silico from the sequenced DNA templates

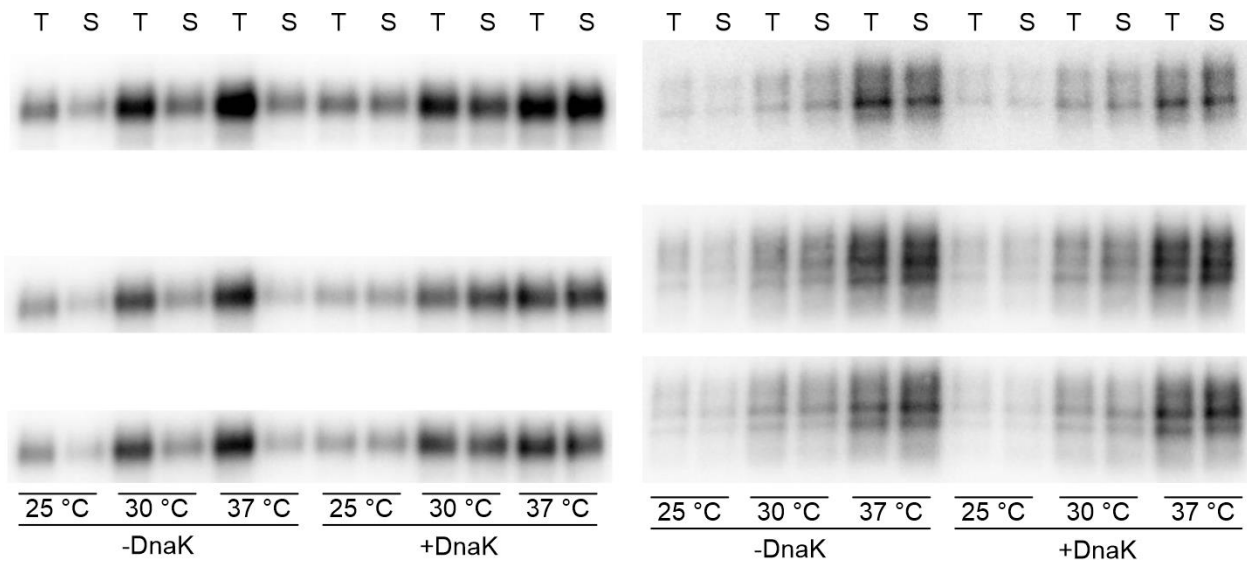

Supplementary Figure S5. Western blot signals used for temperature/chaperone dependent solubility analysis of full (A) and early (B) alphabet libraries. Total expressions (T) and soluble fractions (S) were analyzed

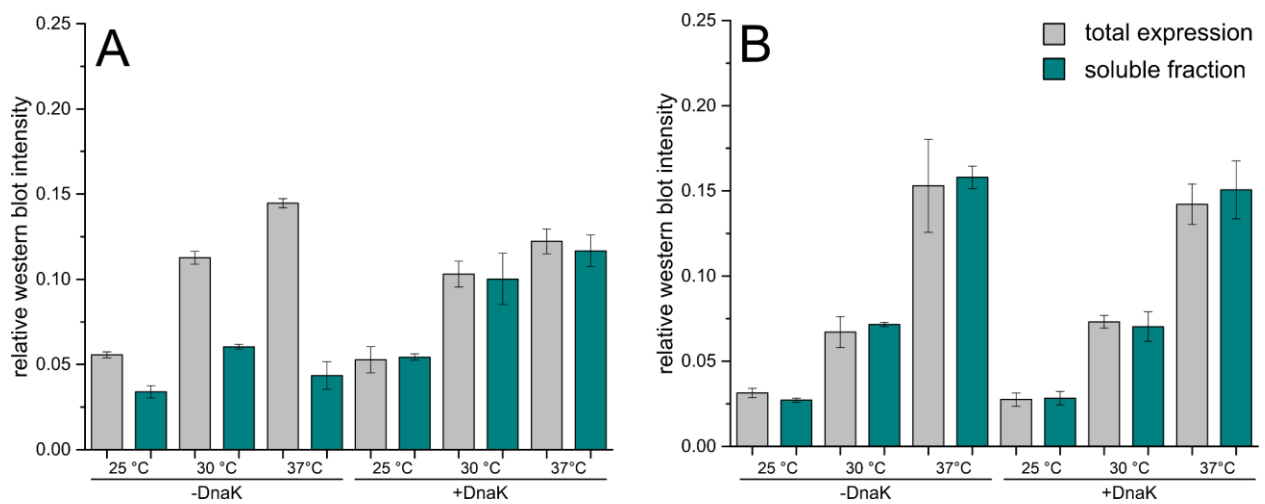

Supplementary Figure S6. Summary of triplicate western blot signal quantification of temperature/chaperone dependent solubility analysis of full (A) and early (B) alphabet libraries. Total expressions (grey) and soluble fractions (green) were analyzed

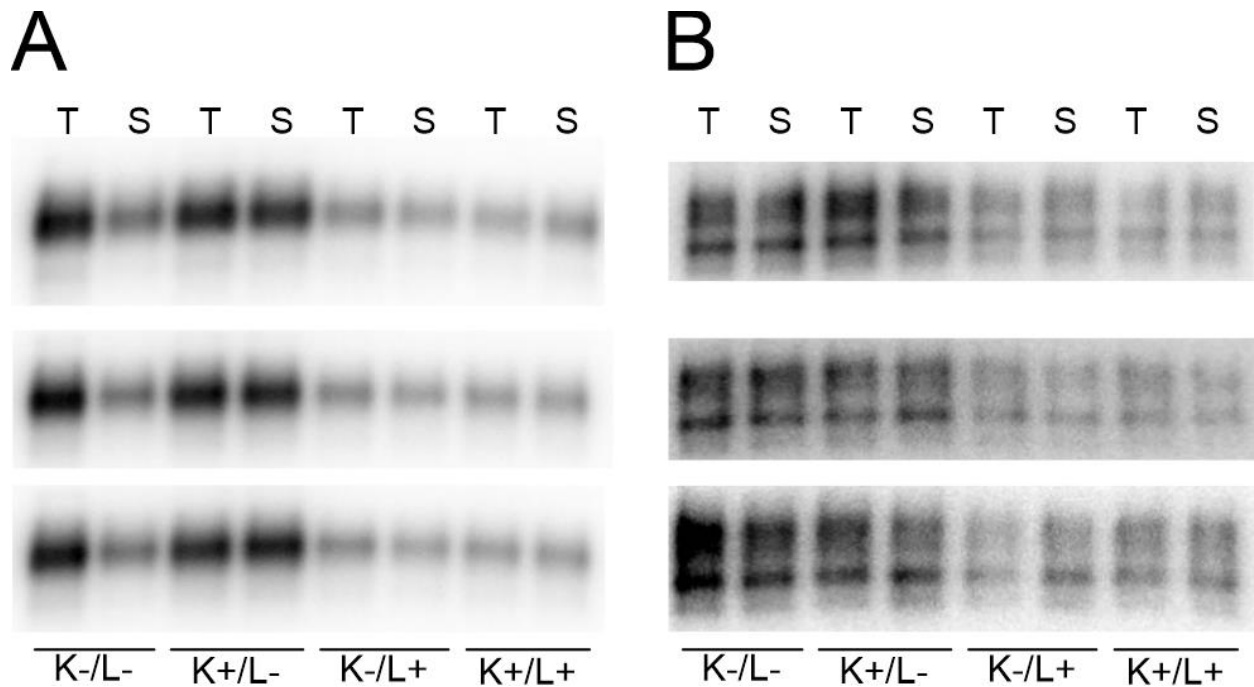

Supplementary Figure S7. Western blot signals used for Lon protease digestion/solubility analysis (K-/L-, K+/L-, K-/L+, K+/L+) and for the temperature dependent aggregation assay (42 °C) of full (A) and early (B) alphabet libraries. Libraries were expressed either in absence/presence of Lon protease (L-/L+) and absence/presence of DnaK/DnaJ/GrpE chaperone system (K-/K+). Total expressions (T) and soluble fractions (S) were analyzed. Only soluble fractions of chaperone absent (-K) or chaperone (+K) were analyzed after 42 °C heat shock treatment

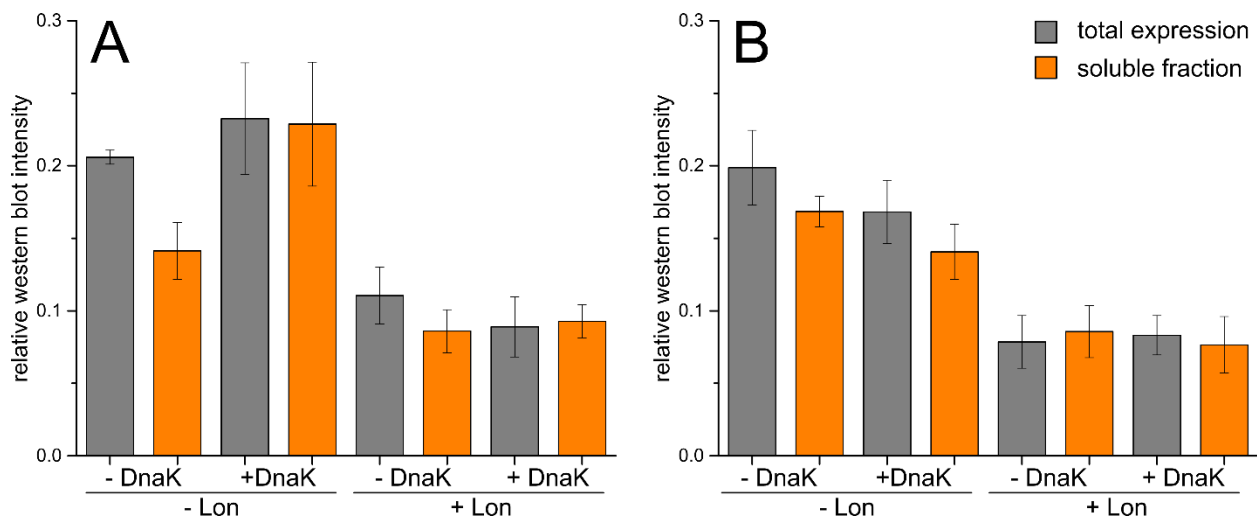

Supplementary Figure S8. Summary of triplicate western blot signal quantification of Lon protease digestion/solubility analysis of full (A) and early (B) alphabet libraries. Total expressions (grey) and soluble fractions (orange) were analyzed

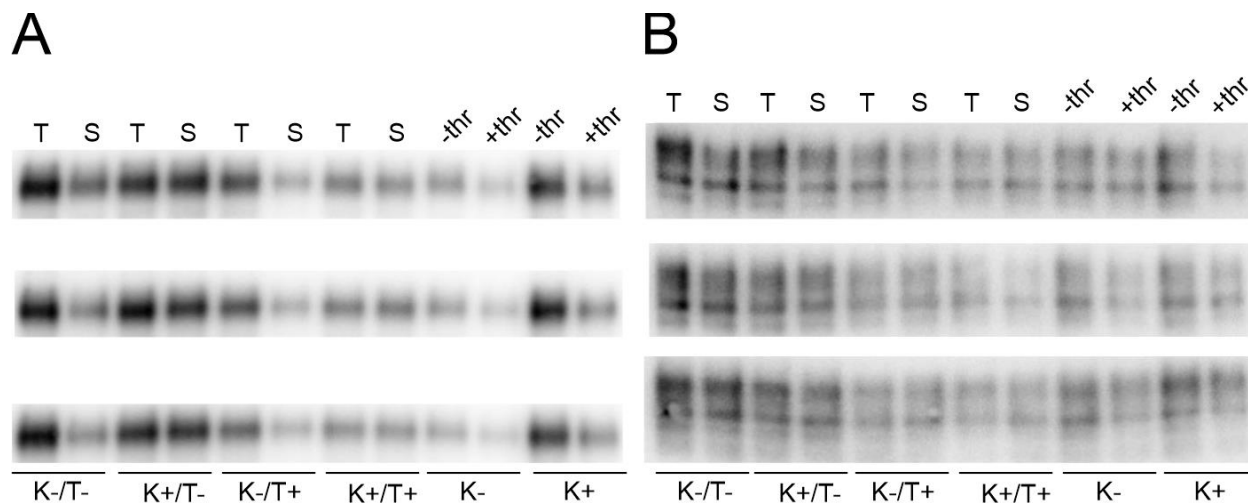

Supplementary Figure S9. Western blot signals used for thrombin protease digestion/solubility analysis (K-/T-, K+/T-, K-/T+, K+/T+) of full (A) and early (B) alphabet libraries. Libraries were expressed either in absence/presence of the DnaK/DnaJ/GrpE chaperone system (K-/K+) and treated/untreated (T+/T-) by thrombin protease. Total expressions (T) and soluble fractions (S) were analyzed.

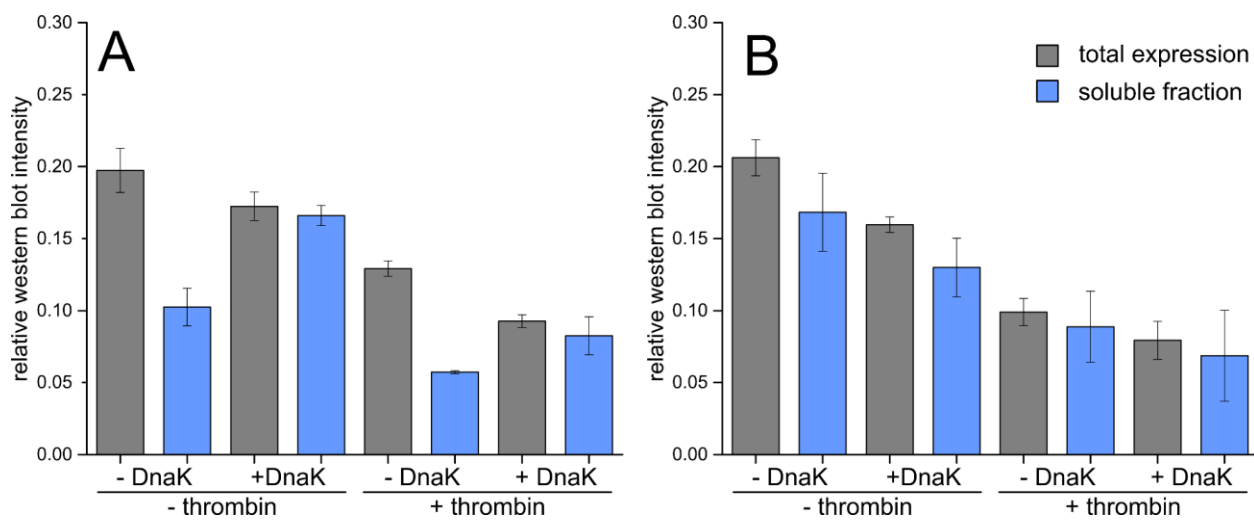

Supplementary Figure S10. Summary of triplicate western blot signal quantification of thrombin protease digestion/solubility analysis of full (A) and early (B) alphabet libraries. Total expressions (grey) and soluble fractions (blue) were analyzed

## Sequences

>20F\_full

CTGTAATACGACTCACTATAGGGACACCAATAGAGAAAGAGGAGAAATACTAGATGGATTA  
TAAAGATGATGATGATAAGKHYKHYRMKD GKWTNNYARRSSHRVDGRMKRRSKHYMWMD  
GKNYAGRRRMKNYAVDGRMKNYASMWSMWMWMKHYKHYVDGVDGKHNYAMWMNYAG  
CGTTAGTCCCGCGTGGGAGCNYASMWRMKKHYKHYVDGNYARMKNYAKHYVDGRRSVDG  
KGS HHYNYAKHYRRSWTNVDGHHYRRSHHYHHYRMKNYANYAHHYSHRVDGHHYKHYDGK  
VDGMWMTNHHYRMKV D GKGSNYAVDGMWMTNYAVDGRRSRRSSHRVDGRRSSMWRMK  
CACCACCACCACCACCTAA

>10E\_full

CTGTAATACGACTCACTATAGGGACACCAATAGAGAAAGAGGAGAAATACTAGATGGATTA  
TAAAGATGATGATGATAAGGNTHYAGNGHYAGNGK CWGNNGNGHYAHYAHYAHYAHYAGN  
THYAHYAHYAHYAHYAKCWGNNGHYAGNTGAHHYAGNGHYAGNGHYAHYAHYAGNGGCGTT  
AGTCCCGCGTGGGAGCGNTHYAGNGGNTGNGK CWGNRBTTHYAHYAGNRBTTHYAHYAG  
NTHYAGNGHYAGNTHYAGNRBTGNGGNGGNRBTTHYAHYAGAHHYAGNTGAHHYAHYAG  
AHHYARBTGAHGNGHYAHYAGNTRBTTHYAGNGGAHHYAGNGGMDGNTHYAGNGCACCAC  
CACCACCACCACCTAA

**Amino acid ratios of constructed libraries 20F and 10E**

| <b>Amino acid<br/>(library 20F)</b> | <b>ratio</b> | <b>Amino acid<br/>(library 10E)</b> | <b>ratio</b> |
|-------------------------------------|--------------|-------------------------------------|--------------|
| F                                   | 0.04         | F                                   | 0            |
| L                                   | 0.1          | L                                   | 0.142        |
| I                                   | 0.06         | I                                   | 0.095        |
| M                                   | 0.02         | M                                   | 0            |
| V                                   | 0.07         | V                                   | 0.12         |
| P                                   | 0.05         | P                                   | 0.065        |
| A                                   | 0.09         | A                                   | 0.118        |
| W                                   | 0.01         | W                                   | 0            |
| G                                   | 0.07         | G                                   | 0.122        |
| S                                   | 0.07         | S                                   | 0.101        |
| T                                   | 0.06         | T                                   | 0.102        |
| Y                                   | 0.03         | Y                                   | 0            |
| Q                                   | 0.04         | Q                                   | 0            |
| N                                   | 0.04         | N                                   | 0            |
| C                                   | 0            | C                                   | 0            |
| D                                   | 0.05         | D                                   | 0.054        |
| E                                   | 0.06         | E                                   | 0.081        |
| H                                   | 0.02         | H                                   | 0            |
| K                                   | 0.05         | K                                   | 0            |
| R                                   | 0.06         | R                                   | 0            |

Supplementary Table S2

## Statistics obtained by amino acid composition analysis of sequenced library constructs

| amino acid | designed 10E | sequenced 10E | squared error      | designed 20F | sequenced 20F | squared error      |
|------------|--------------|---------------|--------------------|--------------|---------------|--------------------|
| A          | 0.118        | 0.11138089    | 4.38126E-05        | 0.09         | 0.060045619   | 0.000897265        |
| C          | 0            | 0.000126502   | 1.60028E-08        | 0            | 0.016746927   | 0.00028046         |
| D          | 0.054        | 0.078464399   | 0.000598507        | 0.05         | 0.050126524   | 1.60083E-08        |
| E          | 0.081        | 0.107400275   | 0.000696975        | 0.06         | 0.055882059   | 1.69574E-05        |
| F          | 0            | 0.000180281   | 3.25013E-08        | 0.04         | 0.04771278    | 5.9487E-05         |
| G          | 0.122        | 0.084749913   | 0.001387569        | 0.07         | 0.047688509   | 0.000497803        |
| H          | 0            | 0.000134772   | 1.81636E-08        | 0.02         | 0.021467382   | 2.15321E-06        |
| I          | 0.095        | 0.105720657   | 0.000114932        | 0.06         | 0.072494652   | 0.000156116        |
| K          | 0            | 0.00033089    | 1.09488E-07        | 0.05         | 0.076937757   | 0.000725643        |
| L          | 0.142        | 0.163457062   | 0.000460406        | 0.1          | 0.099681555   | 1.01407E-07        |
| M          | 0            | 0.000206983   | 4.28421E-08        | 0.02         | 0.029316427   | 8.67958E-05        |
| N          | 0            | 0.000206426   | 4.26117E-08        | 0.04         | 0.067735012   | 0.000769231        |
| P          | 0.065        | 0.053218191   | 0.000138811        | 0.05         | 0.03771341    | 0.00015096         |
| Q          | 0            | 0.001496622   | 2.23988E-06        | 0.04         | 0.040165308   | 2.73269E-08        |
| R          | 0            | 0.000763828   | 5.83433E-07        | 0.06         | 0.045940967   | 0.000197656        |
| S          | 0.101        | 0.100585852   | 1.71519E-07        | 0.07         | 0.063834005   | 3.80195E-05        |
| T          | 0.102        | 0.083069409   | 0.000358367        | 0.06         | 0.056681099   | 1.10151E-05        |
| V          | 0.12         | 0.108123364   | 0.000141054        | 0.07         | 0.059935965   | 0.000101285        |
| W          | 0            | 0.000172568   | 2.97799E-08        | 0.01         | 0.011443048   | 2.08239E-06        |
| Y          | 0            | 0.000210885   | 4.44727E-08        | 0.03         | 0.03845086    | 7.1417E-05         |
| error      |              |               | <b>0.062799398</b> |              |               | <b>0.063753359</b> |



Supplementary Table S3

**Statistics obtained from high throughput sequencing analysis**

|   | total reads     | unique reads   | max. multiplicity | correct expressable constructs |
|---|-----------------|----------------|-------------------|--------------------------------|
| F | 1768293 (100 %) | 1702198 (96 %) | 4                 | 1513985 (85 %)                 |
| E | 1541180 (100 %) | 1448384 (94 %) | 5                 | 1304780 (85 %)                 |

Supplementary Table S4

## Western blot signal intensities of 20F library solubility analysis

|       | 1st      | 2nd      | 3rd      | avg      | SD       | 1st      | 2nd      | 3rd      | avg      | SD       |
|-------|----------|----------|----------|----------|----------|----------|----------|----------|----------|----------|
| F-25T | 1373.415 | 781.368  | 975.018  | 1043.267 | 301.8665 | 0.054732 | 0.054593 | 0.057625 | 0.05565  | 0.001712 |
| F-25S | 936.668  | 492.89   | 511.651  | 647.0697 | 250.9749 | 0.037327 | 0.034437 | 0.030239 | 0.034001 | 0.003564 |
| F-30T | 2717.955 | 1636.547 | 1950.536 | 2101.679 | 556.3219 | 0.108313 | 0.114343 | 0.115279 | 0.112645 | 0.003781 |
| F-30S | 1549.558 | 863.842  | 997.947  | 1137.116 | 363.4247 | 0.061751 | 0.060355 | 0.05898  | 0.060362 | 0.001386 |
| F-37T | 3653.668 | 2025.941 | 2481.881 | 2720.497 | 839.6886 | 0.145602 | 0.141549 | 0.146682 | 0.144611 | 0.002706 |
| F-37S | 1321.08  | 534.543  | 688.156  | 847.9263 | 416.8993 | 0.052646 | 0.037348 | 0.040671 | 0.043555 | 0.008047 |
| F+25T | 1534.369 | 660.144  | 863.845  | 1019.453 | 457.4141 | 0.061146 | 0.046123 | 0.051054 | 0.052774 | 0.007658 |
| F+25S | 1407.286 | 749.519  | 923.859  | 1026.888 | 340.772  | 0.056082 | 0.052368 | 0.054601 | 0.05435  | 0.00187  |
| F+30T | 2586.142 | 1365.636 | 1871.581 | 1941.12  | 613.2173 | 0.10306  | 0.095415 | 0.110612 | 0.103029 | 0.007599 |
| F+30S | 2125.129 | 1640.581 | 1712.689 | 1826.133 | 261.4361 | 0.084688 | 0.114625 | 0.101222 | 0.100178 | 0.014995 |
| F+37T | 2855.814 | 1798.992 | 2150.483 | 2268.43  | 538.193  | 0.113807 | 0.125693 | 0.127096 | 0.122199 | 0.007301 |
| F+37S | 3032.406 | 1762.601 | 1792.534 | 2195.847 | 724.6359 | 0.120844 | 0.12315  | 0.105941 | 0.116645 | 0.009342 |
| sum   | 25093.49 | 14312.6  | 16920.18 | 18775.42 |          |          |          |          |          |          |

## Western blot signal intensities of 10E library solubility analysis

|       |          |          |          |          |          |          |          |          |          |          |
|-------|----------|----------|----------|----------|----------|----------|----------|----------|----------|----------|
| E-25T | 43.952   | 150.68   | 286.532  | 160.388  | 121.581  | 0.029971 | 0.02968  | 0.034564 | 0.031405 | 0.00274  |
| E-25S | 38.384   | 135.433  | 235.79   | 136.5357 | 98.70762 | 0.026174 | 0.026676 | 0.028443 | 0.027098 | 0.001192 |
| E-30T | 83.264   | 366.153  | 600.581  | 349.9993 | 259.0365 | 0.056778 | 0.072122 | 0.072447 | 0.067115 | 0.008954 |
| E-30S | 104.178  | 358.737  | 605.689  | 356.2013 | 250.7651 | 0.071039 | 0.070661 | 0.073063 | 0.071588 | 0.001291 |
| E-37T | 266.963  | 650.71   | 1231.772 | 716.4817 | 485.7556 | 0.182043 | 0.128171 | 0.148586 | 0.152933 | 0.027198 |
| E-37S | 222.918  | 837.598  | 1299.544 | 786.6867 | 540.1156 | 0.152009 | 0.164983 | 0.156761 | 0.157918 | 0.006564 |
| E+25T | 46.96    | 127.136  | 211.227  | 128.441  | 82.14128 | 0.032022 | 0.025042 | 0.02548  | 0.027515 | 0.00391  |
| E+25S | 42.889   | 121.517  | 262.612  | 142.3393 | 111.3316 | 0.029246 | 0.023935 | 0.031678 | 0.028287 | 0.00396  |
| E+30T | 112.807  | 370.676  | 576.208  | 353.2303 | 232.1926 | 0.076924 | 0.073013 | 0.069507 | 0.073148 | 0.00371  |
| E+30S | 104.569  | 310.392  | 650.473  | 355.1447 | 275.6899 | 0.071306 | 0.061138 | 0.078465 | 0.070303 | 0.008707 |
| E+37T | 191.77   | 784.223  | 1170.372 | 715.455  | 492.912  | 0.130769 | 0.154469 | 0.141179 | 0.142139 | 0.011879 |
| E+37S | 207.827  | 863.628  | 1159.168 | 743.541  | 486.9067 | 0.141718 | 0.17011  | 0.139828 | 0.150552 | 0.016964 |
| sum   | 1466.481 | 5076.883 | 8289.968 | 4944.444 |          |          |          |          |          |          |

F/E library 20F or 10E  
 sign +/- DnaK absent or present  
 T/S total or soluble fractions

Supplementary Table S5

**LON proteolysis/solubility analysis of 20F library**

|         | 1st      | 2nd       | 3rd      | 1st      | 2nd      | 3rd      | avg      | SD       | avg corr |
|---------|----------|-----------|----------|----------|----------|----------|----------|----------|----------|
| K-/L- T | 2983.742 | 2884.68   | 3298.423 | 0.205459 | 0.201272 | 0.210875 | 0.205869 | 0.004814 | 0.205869 |
| K-/L- S | 1730.409 | 1648.647  | 1727.763 | 0.119155 | 0.115031 | 0.110459 | 0.114882 | 0.00435  | 0.114882 |
| K+/L- T | 2782.103 | 2635.104  | 2970.071 | 0.191574 | 0.183858 | 0.189883 | 0.188438 | 0.004055 | 0.188438 |
| K+/L- S | 2607.984 | 2762.893  | 2850.042 | 0.179584 | 0.192775 | 0.182209 | 0.184856 | 0.006982 | 0.184856 |
| K-/L+ T | 1293.049 | 1273.935  | 1410.853 | 0.089039 | 0.088886 | 0.090199 | 0.089374 | 0.000718 | 0.089374 |
| K-/L+ S | 1010.515 | 993.633   | 1092.843 | 0.069583 | 0.069329 | 0.069868 | 0.069593 | 0.00027  | 0.069593 |
| K+/L+ T | 951.59   | 1064.119  | 1164.28  | 0.065526 | 0.074247 | 0.074435 | 0.071402 | 0.00509  | 0.071402 |
| K+/L+ S | 1162.95  | 1069.23   | 1127.339 | 0.08008  | 0.074603 | 0.072073 | 0.075585 | 0.004093 | 0.071402 |
| sum     | 14522.34 | 14332.241 | 15641.61 |          |          |          |          |          |          |

Ratios (0-1) in chaperone absent condition

soluble/un<sub>0</sub> 0.338047  
 soluble/de<sub>0</sub> 0.219987  
 agg-prone/ 0.345879  
 agg-prone/ 0.096087

Ratios (0-1) in chaperone present condition

soluble/un<sub>1</sub> 0.401115  
 soluble/de<sub>1</sub> 0.579874  
 agg-prone/ 0.041209  
 agg-prone/ -0.0222

correction for higher solubility in soluble fraction

0.378917  
 0.602072  
 0.019011

|      |                        |
|------|------------------------|
| K+/- | DnaK present/absent    |
| L+/- | Lon present/absent     |
| T/S  | total/soluble fraction |

Supplementary Table S5

**LON proteolysis/solubility analysis of 10E library**

|         | 1st      | 2nd     | 3rd      | 1st      | 2nd      | 3rd      | avg      | SD       | avg corr |
|---------|----------|---------|----------|----------|----------|----------|----------|----------|----------|
| K-/L- T | 417.711  | 183.233 | 288.472  | 0.17375  | 0.196925 | 0.225233 | 0.198636 | 0.025784 | 0.198636 |
| K-/L- S | 390.431  | 168.136 | 208.236  | 0.162403 | 0.1807   | 0.162586 | 0.168563 | 0.010511 | 0.168563 |
| K+/L- T | 462.119  | 151.571 | 191.458  | 0.192222 | 0.162897 | 0.149486 | 0.168202 | 0.021856 | 0.168202 |
| K+/L- S | 340.848  | 147.924 | 155.268  | 0.141779 | 0.158978 | 0.12123  | 0.140662 | 0.018899 | 0.140662 |
| K-/L+ T | 211.682  | 83.808  | 73.787   | 0.088051 | 0.090071 | 0.057611 | 0.078578 | 0.018185 | 0.078578 |
| K-/L+ S | 239.674  | 60.808  | 117.547  | 0.099694 | 0.065352 | 0.091778 | 0.085608 | 0.017983 | 0.078578 |
| K+/L+ T | 164.161  | 80.357  | 121.404  | 0.068284 | 0.086362 | 0.09479  | 0.083145 | 0.013542 | 0.083145 |
| K+/L+ S | 177.46   | 54.632  | 124.601  | 0.073816 | 0.058714 | 0.097286 | 0.076605 | 0.019436 | 0.076605 |
| sum     | 2404.086 | 930.469 | 1280.773 |          |          |          |          |          |          |

Ratios (0-1) in chaperone absent condition

soluble/unf 0.43098

soluble/deq 0.417623

agg-prone/ 0.186792

agg-prone/ -0.03539

correction for higher solubility in soluble fraction

0.395586

0.453017

0.151397

Ratios (0-1) in chaperone present condition

soluble/unf 0.455437

soluble/deq 0.380832

agg-prone/ 0.12485

agg-prone/ 0.038881

Supplementary Table S6

**LON proteolysis/solubility analysis of 20F library**

|         | 1st     | 2nd       | 3rd       | 1st       | 2nd       | 3rd       | avg       | SD        |
|---------|---------|-----------|-----------|-----------|-----------|-----------|-----------|-----------|
| K-/T- T | 3000.18 | 3819.807  | 2691.214  | 0.1924924 | 0.2146316 | 0.1850885 | 0.1974042 | 0.0153718 |
| K-/T- S | 1830.98 | 1667.294  | 1401.612  | 0.1174764 | 0.0936838 | 0.096396  | 0.1025187 | 0.0130245 |
| K+/T- T | 2505.91 | 3174.4    | 2588.193  | 0.1607801 | 0.1783667 | 0.1780032 | 0.1723834 | 0.0100503 |
| K+/T- S | 2566.43 | 3090.356  | 2323.44   | 0.1646629 | 0.1736444 | 0.1597948 | 0.1666034 | 0.0070258 |
| K-/T+ T | 2074.51 | 2189.923  | 1908.886  | 0.1331011 | 0.1230498 | 0.1312838 | 0.1291449 | 0.0053561 |
| K-/T+ S | 895.047 | 1039.228  | 816.991   | 0.0574265 | 0.0583933 | 0.0561886 | 0.0573361 | 0.0011051 |
| K+/T+ T | 1458.57 | 1561.697  | 1403.876  | 0.0935819 | 0.0877504 | 0.0965517 | 0.092628  | 0.0044775 |
| K+/T+ S | 1254.34 | 1254.338  | 1405.933  | 0.0804787 | 0.0704801 | 0.0966932 | 0.0825507 | 0.0132288 |
| sum     | 15586   | 17797.043 | 14540.145 |           |           |           |           |           |

Ratios (0-1) in chaperone absent condition

|                        |           |
|------------------------|-----------|
| soluble/undegradable   | 0.2904505 |
| soluble/degradable     | 0.2288838 |
| agg-prone/degradable   | 0.1169005 |
| agg-prone/undegradable | 0.3637653 |

Ratios (0-1) in chaperone present condition

|                        |           |
|------------------------|-----------|
| soluble/undegradable   | 0.4788784 |
| soluble/degradable     | 0.4842889 |
| agg-prone/degradable   | -0.021626 |
| agg-prone/undegradable | 0.0584589 |

**Western blot signal intensities used in thermostability assay 20F**

|          | 1st    | 2nd       | 3rd      | 1st      | 2nd      | 3rd      | avg      | SD       |
|----------|--------|-----------|----------|----------|----------|----------|----------|----------|
| K-/T- T  | 3000.2 | 3819.807  | 2691.214 | 0.272796 | 0.289389 | 0.254646 | 0.272277 | 0.014188 |
| K-/T- HS | 1127.8 | 1058.334  | 966.027  | 0.102543 | 0.080179 | 0.091407 | 0.091377 | 0.00913  |
| K-/T+ HS | 631.25 | 670.65    | 589.314  | 0.057398 | 0.050808 | 0.055762 | 0.054656 | 0.002801 |
| K+/T- T  | 2505.9 | 3174.4    | 2588.193 | 0.227854 | 0.240493 | 0.244898 | 0.237748 | 0.007224 |
| K+/T- HS | 2446.7 | 2972.882  | 2531.673 | 0.222472 | 0.225226 | 0.23955  | 0.229082 | 0.007487 |
| K+/T+ HS | 1286.1 | 1503.502  | 1202.02  | 0.116936 | 0.113905 | 0.113737 | 0.114859 | 0.00147  |
| sum      | 10998  | 13199.575 | 10568.44 |          |          |          |          |          |

Ratios (0-1) of total library expression after heat shock treatment - chaperone absent

|                           |          |
|---------------------------|----------|
| Soluble after heatshock   | 0.335601 |
| Uncleaved after heatshock | 0.200737 |

Ratios (0-1) of total library expression after heat shock treatment - chaperone present

|                           |          |
|---------------------------|----------|
| Soluble after heatshock   | 0.96355  |
| Uncleaved after heatshock | 0.483113 |

|      |                         |
|------|-------------------------|
| K+/- | DnaK present/absent     |
| T+/- | thrombin present/absent |
| T/S  | total/soluble fraction  |

Supplementary Table S6

**LON proteolysis/solubility analysis of 10E library**

|         | 1st      | 3rd      | 5th grad | 1st      | 3rd      | 5th grad | avg      | SD       |
|---------|----------|----------|----------|----------|----------|----------|----------|----------|
| K-/T- T | 344.386  | 489.768  | 438.41   | 0.218775 | 0.201046 | 0.1987   | 0.206174 | 0.010976 |
| K-/T- S | 226.658  | 444.347  | 394.329  | 0.143987 | 0.182401 | 0.178722 | 0.16837  | 0.021196 |
| K+/T- T | 271.972  | 402.14   | 311.879  | 0.172773 | 0.165076 | 0.141353 | 0.159734 | 0.016377 |
| K+/T- S | 175.465  | 342.11   | 304.136  | 0.111466 | 0.140434 | 0.137844 | 0.129915 | 0.016029 |
| K-/T+ T | 173.464  | 235.932  | 198.159  | 0.110195 | 0.096848 | 0.089812 | 0.098952 | 0.010353 |
| K-/T+ S | 105.589  | 248.516  | 214.716  | 0.067077 | 0.102014 | 0.097316 | 0.088802 | 0.018961 |
| K+/T+ T | 138.014  | 167.85   | 180.114  | 0.087675 | 0.068901 | 0.081633 | 0.079403 | 0.009583 |
| K+/T+ S | 138.606  | 105.432  | 164.643  | 0.088051 | 0.043279 | 0.074621 | 0.06865  | 0.022975 |
| sum     | 1574.154 | 2436.095 | 2206.386 |          |          |          |          |          |

Ratios (0-1) in chaperone absent condition

|                        |          |
|------------------------|----------|
| soluble/undegradable   | 0.430714 |
| soluble/degradable     | 0.385926 |
| agg-prone/degradable   | 0.134132 |
| agg-prone/undegradable | 0.049228 |

Ratios (0-1) in chaperone present condition

|                        |          |
|------------------------|----------|
| soluble/undegradable   | 0.42978  |
| soluble/degradable     | 0.383538 |
| agg-prone/degradable   | 0.119366 |
| agg-prone/undegradable | 0.067316 |

**Western blot signal intensities used in thermostability assay 10E**

|          | 1st      | 3rd     | 5th grad | 1st      | 3rd      | 5th grad | avg      | SD       |
|----------|----------|---------|----------|----------|----------|----------|----------|----------|
| K-/T- T  | 344.386  | 489.768 | 438.41   | 0.27906  | 0.266954 | 0.244005 | 0.26334  | 0.014537 |
| K-/T- HS | 177.773  | 312.79  | 308.92   | 0.144051 | 0.17049  | 0.171935 | 0.162159 | 0.012818 |
| K-/T+ HS | 134.808  | 149.365 | 194.615  | 0.109236 | 0.081413 | 0.108317 | 0.099655 | 0.012905 |
| K+/T- T  | 271.972  | 402.14  | 311.879  | 0.220382 | 0.219192 | 0.173582 | 0.204385 | 0.021787 |
| K+/T- HS | 224.577  | 313.302 | 328.411  | 0.181977 | 0.170769 | 0.182783 | 0.17851  | 0.005483 |
| K+/T+ HS | 80.578   | 167.285 | 214.49   | 0.065293 | 0.091181 | 0.119378 | 0.091951 | 0.022087 |
| sum      | 1234.094 | 1834.65 | 1796.725 |          |          |          |          |          |

Ratios (0-1) of total library expression after heat shock treatment - chaperone absent

|                           |          |
|---------------------------|----------|
| Soluble after heatshock   | 0.615778 |
| Uncleaved after heatshock | 0.378429 |

Ratios (0-1) of total library expression after heat shock treatment - chaperone present

|                           |          |
|---------------------------|----------|
| Soluble after heatshock   | 0.873399 |
| Uncleaved after heatshock | 0.44989  |
